# Supplementary material for: Genome-wide analysis of the Catalpa bungei caffeic acid O-methyltransferase (COMT) gene family: identification and expression profiles in normal, tension, and opposite wood
Source: PeerJ. 2019 Mar 14;7:e6520. doi: 10.7717/peerj.6520 (PMC6421059; doi:10.7717/peerj.6520)
Supplement: File S1 [file peerj-07-6520-s003.xlsx]

## Sheet: Sheet1
		Identity(%)
		CbuCOMT5	CbuCOMT3	CbuCOMT11	CbuCOMT10	CbuCOMT9	CbuCOMT8	CbuCOMT7	CbuCOMT6	CbuCOMT14	CbuCOMT22	CbuCOMT21	CbuCOMT20	CbuCOMT15	CbuCOMT13	CbuCOMT12	CbuCOMT4	CbuCOMT2	CbuCOMT1	CbuCOMT23	CbuCOMT19	CbuCOMT18	CbuCOMT17	CbuCOMT16
Similarity(%)	CbuCOMT5		49.3	46.6	28.2	73.6	35.4	17.1	51.1	52.1	50.7	91.3	45.9	40.3	29	20.9	40.4	23.5	20.4	29.2	31.6	30.4	26.2	33.2
	CbuCOMT3	70.5		82.5	30.6	44.6	35.2	17.3	62	71.6	71.6	50.7	48.3	43.7	29.1	22	43	24.2	20.3	31.3	32	29.8	25.3	33.7
	CbuCOMT11	66.2	84.3		27.4	41.9	34.3	16.7	56.3	67.5	67.3	47.2	44.7	40.8	26.5	22.6	40.2	22.3	19.3	29.3	29.9	29.7	24.9	36.7
	CbuCOMT10	46.9	51.3	46.6		25.1	51.8	21.8	31.8	29.5	29.7	26.8	30	27.7	24	23.8	27.6	22.1	17.3	27.8	26.3	25.7	24.9	20.9
	CbuCOMT9	79.8	67.2	59.9	45.5		33.2	21.4	46.6	45.7	45	74.1	43.3	42.4	29	21.6	42.1	21.2	22.9	26.5	29	28.5	25.1	31.7
	CbuCOMT8	54.2	56.4	54.5	66.1	50.3		33	39.5	39.9	37.8	35.1	38	36.2	32	22.2	36.4	24	24.3	31.3	32.9	34	28	25.9
	CbuCOMT7	29.5	31	28.8	39.1	33.5	45.8		19.2	17.4	17.6	17.5	19.2	21.5	17.8	20	20.9	18.3	26	15.6	19.1	20.3	15.6	13.8
	CbuCOMT6	68	78.3	70.2	48.5	65.2	55.6	31.3		64	63.3	51.4	54	47.9	28.3	24.1	46.9	23.6	21.7	29	30.1	30.6	26.1	37.4
	CbuCOMT14	69.7	84.6	78.5	48.4	63.2	59.2	33.6	78.6		88.4	51.8	49.9	46.9	31	24.3	46.5	25.4	20.9	30.2	31.9	31.7	29.2	35.6
	CbuCOMT22	68.8	82.9	77	48.7	63.2	57.5	33	80.3	92.8		51.4	48.5	45.8	28.9	24.6	45.7	24.3	20.8	30.1	30.7	30.7	27.9	34.3
	CbuCOMT21	94.9	70.7	65.4	48	83	53.6	30.4	69.6	69.9	68.5		47.1	40.7	29.3	21.8	40.9	23.2	21.5	28.5	31.7	31	27.2	34.3
	CbuCOMT20	67.1	68.6	63.1	49.1	61.1	57.5	33.1	68.9	68.6	70.6	68.2		72.5	34.5	27.8	71.4	24.8	24.2	31.8	34.7	33.7	27.7	63.1
	CbuCOMT15	57.9	60.3	54.7	46.3	62.5	52.2	36	62	61.7	62	58.5	80.6		32.8	26	94.1	23.3	26.7	28.7	32.8	32.8	27	52.6
	CbuCOMT13	48.4	48.4	46.3	45.1	49.7	54.7	30.2	48.1	50.5	48.1	50	56.9	52.5		42.2	32.2	34.9	51.6	51.1	65.9	68.1	46.2	26.1
	CbuCOMT12	36	37.4	34.6	42.4	36.6	36.4	36.5	35.7	38.8	39.4	36.4	40.3	38.8	53.3		23.7	41.8	46	49	55.5	55.6	31.1	19.8
	CbuCOMT4	59	60.6	55	46.6	61.8	52.2	36.3	62	62	62.3	58.8	79.7	97.2	51.6	38.4		24	24.6	30	31.6	30.9	27.8	51.8
	CbuCOMT2	34.3	34.8	32.2	36.4	32.6	34.4	34.1	36	34.2	34.8	35.5	34.9	34.8	43.4	52.2	35		24	49.2	42.7	45	29	19.4
	CbuCOMT1	35.7	37.4	34.6	36.7	41.5	39.7	39.5	38.3	38.3	35.7	38.1	42.3	45.7	59.6	61.7	44.7	35.5		43.6	60.7	72	34.5	17.2
	CbuCOMT23	46.1	48.7	44.8	49.8	48	50	27.9	48.5	48.1	47.2	47.4	52	50	65.4	62	50.6	54.8	59		68.9	66.3	41.4	24.4
	CbuCOMT19	52.5	52.3	49.2	45.2	50.6	54.4	30.5	52.8	53.7	52.8	54	59	55.4	79.9	62.1	55.4	46.9	66.9	76.3		83.6	46.9	25.4
	CbuCOMT18	51.1	51.8	50.8	47	49.6	55	30.6	51.6	53	50.4	53.8	57.5	54.4	81.3	62.3	53.3	49.9	72.2	75.9	92.1		47.2	24.6
	CbuCOMT17	48.6	47.6	47.6	47.3	45.7	52.4	28	47.3	49.7	49.7	49.5	50.3	48.6	68.2	44	48.4	38.3	47.3	54.9	65.5	64.4		20.4
	CbuCOMT16	48.5	47.9	52.1	33.7	44.6	41.8	25.6	48.3	49.3	49.1	49.1	66.1	58	42	30	57.2	27.8	30.4	39.1	44	43.2	38.7
